# Supplementary material
Source: publisher site journal article supplement (https://www.dovepress.com/article/311334)
Supplement: Supplementary file 1 [file get_supplementary_file.php]

**Supplementary materials**

**Supplementary Table S1: Questionnaire**

1. **Have you or anyone in your household been sick with COVID-19?** (below is the rating scale):

| 1. Both myself and another person from my household | 2. Only myself | 3. Only another person from the household | 4. No one has been sick | 9. I don’t know |
| --- | --- | --- | --- | --- |

1. **To what extent do you feel, if at all, that you are at risk of being infected with the coronavirus?** (below is the rating scale:

| 1. No risk at all | 2. Low risk | 3. Medium risk | 4. High risk | 5.Very high risk | 9. I don’t know |
| --- | --- | --- | --- | --- | --- |

1. **Are you of the impression that the children are suffering or not suffering during the period in which their schools are closed?** (below is the rating scale):

| 1. They are certainly suffering | 2. I think they are suffering | 3. I think they are not suffering | 4. They are certainly not suffering | 9. I don’t know |
| --- | --- | --- | --- | --- |

1. **To what extent do you agree or not agree with the following statements**:
   1. The damage to the economy due to the lockdowns and restrictions harms the country more than COVID-19 would have damaged it had there been no lockdowns and restrictions

| **1. Strongly agree** | **2. Agree** | **3. Disagree** | **4. Strongly Disagree** | **9. I don’t know** |
| --- | --- | --- | --- | --- |

- 1. The damage to people’s sense of freedom damages Israeli society more than COVID-19 would have damaged it.

| **1. Strongly agree** | **2. Agree** | **3. Disagree** | **4. Strongly Disagree** | **9. I don’t know** |
| --- | --- | --- | --- | --- |

1. **What is more damaging to the mental health of the citizens – the restrictions and lockdowns or COVID-19** **had there been no lockdowns and restrictions?** (below is the rating scale):

| 1. The restrictions and lockdowns are much more damaging | 2. The restrictions and lockdowns are more damaging | 3. COVID-19 would have been more damaging | 4. COVID-19 would have been much more damaging | 9. I don’t know |
| --- | --- | --- | --- | --- |

1. **Could herd immunity be achieved naturally without the need of intervention by the Pfizer and Moderna vaccines?** (below is the rating scale):

| 1. It certainly could have been achieved | 2. I think it could have been achieved | 3. I don’t think it could have been achieved | 4. It certainly could not have been achieved | 9. I don’t know |
| --- | --- | --- | --- | --- |

1. **While a campaign to vaccinate the public is underway and many in the public are getting vaccinated, was imposing a third lockdown, which was characterized by opening the schools and by less restrictive enforcement, justified or not?** (below is the rating scale):

| 1. Absolutely justified | 2. Justified | 3. Unjustified | 4. Absolutely unjustified | 9. I don’t know |
| --- | --- | --- | --- | --- |

1. **In the context of COVID-19 information and recommendations – who do you believe more?** (below is the rating scale):

| 1. Doctors who are on the committees advising the Ministry of Health about COVID-19 | 2. Doctors who are not advising the Ministry of Health about COVID-19 | 3. Doctors in both groups to the same extent | 4. No one | 9. I don’t know |
| --- | --- | --- | --- | --- |

1. **Are the following statements true or untrue about you**:
   1. At first it was hard for me to accept the positions of experts who criticized the Ministry of Health’s strict policy and as time goes by, I have begun accepting their positions

| **1.Very true of me** | **2. Somewhat true of me** | **3. Somewhat untrue of me** | **4. Very untrue of me** | **9. I don’t know** |
| --- | --- | --- | --- | --- |

- 1. People in the health system who criticize the system or express disagreement with the system are jeopardizing their career

| **1.Very true** | **2. Somewhat true** | **3. Somewhat untrue** | **4. Very untrue** | **9. I don’t know** |
| --- | --- | --- | --- | --- |

1. **Is it true or untrue that as long as the COVID-19 committee’s protocols are privileged (gag order) for the next thirty years it is hard to trust the government?** (below is the rating scale):

| 1. Very true | 2. Somewhat true | 3. Somewhat untrue | 4. Very untrue | 9. I don’t know |
| --- | --- | --- | --- | --- |

1. **Was the instruction that no close family member come in contact with elderly people justified or unjustified?** (below is the rating scale):

| 1. Very justified | 2. Somewhat Justified | 3. Somewhat unjustified | 4. Very unjustified | 9. I don’t know |
| --- | --- | --- | --- | --- |

1. **Is it your impression that the government is presenting to the public all the disadvantages of the vaccines?** (below is the rating scale):

| 1. Presenting all the disadvantages | 2. Presenting a large portion of the disadvantages | 3.Presenting a small portion of the disadvantages | 4. Not presenting any disadvantages | 9. I don’t know |
| --- | --- | --- | --- | --- |

1. **Are you receiving information from the Ministry of Healthy in a completely transparent manner?** below is the rating scale:

| 1. I am not receiving any information | 2. I am receiving transparent information to a lesser extent | 3.I am receiving information that is somewhat transparent. | 4. I am receiving a lot of information | 5. I am receiving information to a great extent | 9. I don’t know |
| --- | --- | --- | --- | --- | --- |

1. **Which of the following statements is most appropriate?** (below is the rating scale):

| 1. Citizens must be required to get vaccinated and those who do should get a reward (Green Passport) | 2. Citizens must be required to get vaccinated but no reward (Green Passport) should be given to those who do | 3.Vaccination should not be a requirement but those who do get the vaccine should get a reward (Green Passport) | 4. Vaccination should not be required of rewarded (Green Passport) | 9. I don’t know |
| --- | --- | --- | --- | --- |

1. **To what extent is each of the following statements true or not about you**:
   1. I believe the vaccine will protect me from getting infected with COVID-19

| **1.Very true of me** | **2. Somewhat true of me** | **3. Somewhat untrue of me** | **4. Very untrue of me** | **9. I don’t know** |
| --- | --- | --- | --- | --- |

- 1. I do not have sufficient information about the COVID-19 vaccine to make an informed decision whether or not to get vaccinated

| **1.Very true of me** | **2. Somewhat true of me** | **3. Somewhat untrue of me** | **4. Very untrue of me** | **9. I don’t know** |
| --- | --- | --- | --- | --- |

- 1. The effects of the vaccine have not been tested over a long period of time and therefore the vaccination campaign in Israel constitutes an experiment on humans.

| **1.Very true of me** | **2. Somewhat true of me** | **3. Somewhat untrue of me** | **4. Very untrue of me** | **9. I don’t know** |
| --- | --- | --- | --- | --- |

- 1. It is important that people over 65 and people in at-risk groups get vaccinated.

| **1.Very true of me** | **2. Somewhat true of me** | **3. Somewhat untrue of me** | **4. Very untrue of me** | **9. I don’t know** |
| --- | --- | --- | --- | --- |

- 1. Young people should put off getting the vaccine until they see how it affects people worldwide.

| **1.Very true of me** | **2. Somewhat true of me** | **3. Somewhat untrue of me** | **4. Very untrue of me** | **9. I don’t know** |
| --- | --- | --- | --- | --- |

1. **In your opinion, what methods are the Prime Minister’s Office and the Ministry of Health using to communicate the COVID-19 crisis to the public?** below is the rating scale:

| 1. Intimidation methods | 2. Methods that originate from understanding the public sentiment (empathy) | 3.Methods of providing complete information transparency about the COVID-19 crisis | 4. Methods of encouraging social solidarity | 9. I don’t know |
| --- | --- | --- | --- | --- |

1. **To what extent do you believe that you will be able to return to your normal life routine after getting the two doses of the vaccine?** (below is the rating scale):

| 1. I strongly believe it | 2. I believe it | 3. I don’t believe it | 4. I strongly don’t believe it | 9. I don’t know |
| --- | --- | --- | --- | --- |

1. **Should the restrictions on meeting elderly people have been imposed or should each elderly person been allowed to decide for themselves whether or not they want to meet family members?** (below is the rating scale):

| 1. I strongly believe that meeting with elderly people should have been prohibited | 2. I think that meeting with elderly people should have been prohibited | 3. I think that each elderly person should have been allowed to decide for themselves | 4. I strongly believe that each elderly person should have been allowed to decide for themselves | 9. No opinion |
| --- | --- | --- | --- | --- |

1. **With respect to each of the following descriptions please indicate the extent to which it describes you. Give your answer on a scale of 1 to 7, where 1 means ‘does not describe me at all’ and 7 – ‘completely describes me’.**

|  | **1** | **2** | **3** | **4** | **5** | **6** | **7** | **Don’t know** |
| --- | --- | --- | --- | --- | --- | --- | --- | --- |
| **19.1 I am critical** |  |  |  |  |  |  |  |  |
| **19.2 I care about other people’s opinions** |  |  |  |  |  |  |  |  |
| **19.3 I am anxious** |  |  |  |  |  |  |  |  |
| **42.4 I am open to new experiences** |  |  |  |  |  |  |  |  |
| **42.5 I am conservative/ follow the norms** |  |  |  |  |  |  |  |  |
| **42.6 I tend to take responsibility even when I know that there are others that are responsible for taking care of the matter** |  |  |  |  |  |  |  |  |

1. **How old are you?:**
2. **The average household income in Israel is NIS 13,500 (gross) (if you live alone, it is NIS 7,950 (gross) for an individual). Where do you rate your household’s income relative to the average:** (below is the rating scale:

| 1. Well below average | 2. A little below average | 3. Same as the average | 4. A little over average | 5. Well above average | 9. Decline to answer) |
| --- | --- | --- | --- | --- | --- |

1. **What is your highest level of education?** (below is the rating scale):

| 1. Elementary / partial high school | 2. High school | 3. Tertiary education | 4. Academic | 9. Decline to answer |
| --- | --- | --- | --- | --- |

1. **Do you have any underlying condition (for example: diabetes, oncology patient, heart condition, and so forth)** (below is the rating scale):

| 1. I have an underlying condition | 2. I do not have an underlying condition | 9. Decline to answer |
| --- | --- | --- |

1. **Where were you born?** (below is the rating scale):

| 1. Israel | 2. The Former Soviet Union | 3. Other | 9. Decline to answer |
| --- | --- | --- | --- |

1. **Did you immigrate before or after 1990?** (below is the rating scale):

| 1. Before 1990 | 2. 1990 and later | 9. Refuse to answer |
| --- | --- | --- |

1. **Marital status** (below is the rating scale:

| 1. Married/ in a relationship / divorced /widow(er), with children | 2. Married/ in a relationship / divorced /widow(er), without children | 3. Single not in a relationship with children | 4. Single not in a relationship without children | 9. Decline to answer |
| --- | --- | --- | --- | --- |

1. **According to you and your family’s ethnic origin, how would you define yourself?** (below is the rating scale):

| 1. Ashkenazi | 2. Mizrahi | 3. Sephardic | 4. Combination of Ashkenazi and Mizrahi | 5. Native of the Soviet Union | 6. Member of the Ethiopian community | 7. Other | 9. Decline to answer |
| --- | --- | --- | --- | --- | --- | --- | --- |

**Supplementary Table S2:** Coalition Positions versus Opposition Positions about Controversial Topics

| Topic | The Coalition | The Opposition |
| --- | --- | --- |
| Three Lockdowns | In favor of Lockdowns  Israel was under three lockdowns. The first lockdown started around the Passover holiday, and its purpose was to lower morbidity and not to get to a situation resembling that in other countries such as Italy and the USA.[1](#_ENREF_1)  To avoid a second lockdown, the Coronavirus Project Coordinator Ronni Gamzu recommended the Traffic Light Plan (Ramzor) to the Coronavirus Cabinet. The purpose of the Ramzor plan was to establish a unified procedure that would regulate cities’ activities in accordance with the morbidity rate in each municipality.[2](#_ENREF_2) However, the plan was not approved, and in September the government approved a second lockdown. Upon the increase in the R statistic (the average number of people one infected person will pass on a virus to) and the spread of the British and South African mutations in Israel, the country went under a third lockdown.  Change in Perceptions of Lockdowns as a Means of Controlling the Virus  Professor Ran Balicer, Head of the Professional Coronavirus Cabinet at Magen Israel: “The forecasts were wrong. The lockdown as a magical cure is no longer feasible, it’s dead.”[3](#_ENREF_3) | Against Lockdowns  First Lockdown: Prof. Yoram Lass: “The pandemic is dying out in 24 European countries, the number of COVID-19 deaths is lower than the number of flu deaths in 2017… this lockdown needs to be entirely cancelled. Eventually everyone is going to be infected with the virus, with or without a lockdown. The lockdown does not prevent infection, it only causes a slower infection… lockdown is unemployment and unemployment is death…”[4](#_ENREF_4)  Prof. Udi Qimron (from the Model Common Sense and the COVID-19 Public Emergency Council - PECC) and Dr. Uri Gavish: “And can we determine that the policy recommended by the Ministry of Health’s experts indeed succeeded? Unfortunately, that argument does not have a scientific basis, and the results on the ground indicate that it did not succeed. An observation published by Prof. Isaac Ben-Israel demonstrates that even after implementing a lockdown policy, as well as after implementing a no-lockdown policy, the rapid spread of the virus stops after a similar timeframe (perhaps due to natural immunity? – we will get to that later).”[5](#_ENREF_5)  The Traffic Light Plan (Ramzor):  Idit Matot as part of Magen Israel’s Professional Coronavirus Cabinet: “It is a shame that the government did not declare red cities or tight restrictions as was recommended at first, but rather a lockdown… there is no infection due to walking in public space, there is infection in closed quarters and at gatherings…”[6](#_ENREF_6)  Second Lockdown:  Dr. Amir Shachar of the Model Common Sense and the PECC: “A lockdown is a serious mistake. Mortality was higher in countries that had a lockdown… “[7](#_ENREF_7)  Third Lockdown:  PECC: “This devastating third lockdown will cause serious damage to hundreds of thousands of Israeli households. …it is not health versus the economy. It is damage to health!”[8](#_ENREF_8) |
| Testing | At first against expansion of the testing policy, and later in favor of increasing the number of tests.  Sadetzki set the tone with respect to implementation of the COVID-19 testing policy. At the beginning of the crisis Sadetzki argued that increasing the number of tests, as well as expanding the conditions for performing tests, are not necessary means for curbing the pandemic.[9](#_ENREF_9)  The policy changed due to public pressure on the ministry, and following the outbreak of the pandemic in nursing homes and Yuli Edelstein taking office as the Minister of Health, the criteria were expanded.[10](#_ENREF_10) | Dr. Avi Mizrachi of the Model Common Sense: “The Ministry of Health’s testing policy is erroneous from a medical and epidemiological standpoint. The tests performed nowadays are screening tests. In other words, they are testing a very large number of people who are not sick, asymptomatic, and when screening tests are performed the sample group needs to be very accurately fine-tuned, otherwise it is ineffective, unnecessary and wasteful.”[11](#_ENREF_11) |
| At-Risk Groups – Children | Shutting down the schools to curb the morbidity.  Bar Siman Tov: “We are seeing a doubling of the number of daily tests among people who are not in schools. You cannot close it off. Kids come home, they have parents, friends, immediate surrounding”.[12](#_ENREF_12)  Prof. Eli Vaksman, physicist and astrophysics expert from the Weizmann Institute who is advising the National Security Council (NSC) in the battle against the COVID-19 pandemic: “It is very important to stop right now and not continue lifting restrictions… a rapid reopening will create a loss of control and we will go back to another lockdown that will be even more devasting.”[13](#_ENREF_13) | Against closing the schools  PECC: “Studies worldwide consistently demonstrate that children get infected less and even infect fewer people, especially adults. Meta-analysis discovered that a child’s chance of getting infected is 50% lower than of an adult. According to the American CDC, infection rate in children is less than 2% of COVID-19 cases. Furthermore, in approximately 90% of adult infection cases that have a known infection source, it was found that the source was other adults, not children”.[14](#_ENREF_14)  PECC: “You are disregarding the devastation caused by your irresponsible, shortsighted policy. You keep disregarding all the numbers that demonstrate that we are indeed losing children, but not to the disease… in all countries around the world the segment of young people hurt by COVID-19 is negligible to non-existent… we call upon you in the name of science, morality, ethics and the Hippocratic Oath: change your policy immediately, open the schools.”[15](#_ENREF_15) |
| At-Risk Groups – Elderly People | Locking down the entire population to safeguard at-risk groups.  Bar Siman Tov: “Indeed our population is young, but we have a large mass of elderly people who are vulnerable to the disease… had we not gone under lockdown, there certainly could have been thousands of deaths”.[12](#_ENREF_12) | Safeguarding the at-risk group  Prof. Udi Qimron, Prof. Eyal Shachar, Prof. Michael Levitt and Dr. Uri Gavish from the Model Common Sense: “Contrary to popular opinion, it was not the goal of the Swedish policy to get as many people as possible sick with COVID-19. Its goal was and still is to enable normal life, while recommending that vulnerable people take precautions and allowing people who are not at risk to be exposed to the virus and thus develop immunity”.[16](#_ENREF_16)  Prof. Asher Elhayani:  “… The elderly have also reached their limits. We need to let them go out to the parks, breathe fresh air. As individuals, at designated times. That is how you take care of a pandemic. Not by locking everyone in prison.[17](#_ENREF_17) |
| COVID-19 Morbidity Data-  Reproduction Rate (R) | The government is relying on the reproduction rate (R) in making its decisions.  Prof. Eran Segal, professor of computational biology at the Weizmann Institute of Science, Computer Science Department, and some of the team of experts advising the NSC in its fight against COVID-19: “… we have to stop now and see how lifting the restrictions that went into effect yesterday impact the reproduction rate and the number of daily new cases in Israel. Unfortunately, I am not sure we can continue lifting restrictions.”[13](#_ENREF_13) | The reproduction rate R is meaningless and inaccurate.  Dr. Gavish of the Model Common Sense about reproduction rate R:  “The reproduction rate R is a figure that is meaningless as far as its ability to predict. The reason I am mentioning it is that unfortunately it has appeared in a number of presentations that were presented to decision makers and others and a meaningless reproduction rate managed to shut down the country more than once…”  A year’s experience shows us that this week’s R does not tell us what next week’s R is going to be. The whole idea of a multiplication coefficient is that we can say there will be growth at a rate we can predict. We cannot predict, and therefore using it is scientifically flawed.”[18](#_ENREF_18) |
| There are no infections in the open air; keep distance and wear masks | Shutting down the beaches and parks[19](#_ENREF_19) | Model Common Sense: “The effectiveness of wearing masks to prevent the spread of the coronavirus is not proven (we mean the common types of masks, and the way they are used on a daily basis, as opposed to, for example, how masks are used in the medical environment). There are contradictory studies about this issue… In any case, we believe there is no point in wearing masks in open spaces, since transmission of the virus in the open air is very low in general, and in particular it should not be required…”[20](#_ENREF_20) |
| Hospital Collapse | Heavy load at the hospitals, the hospitals are collapsing.  Prof. Eran Segal of the Weizmann Institute: Prof. Segal… “The moment the load begins to increase there is a gradual process through which it starts to make an impact. Doctors in all the COVID-19 departments describe it in their own voice, and we see it in the data analysis.”[21](#_ENREF_21)  Prof. Ran Balicer: “I don’t see any other way considering the fact that at this very moment the hospitals are under a very heavy load, and some of them are saying that the quality of treatment is being compromised.”[22](#_ENREF_22) | There is no load at the hospitals, the hospitals are not collapsing in comparison to previous years.  PECC: “Not only is the December 2020 load not high, but it is extraordinarily low… only 3 COVID-19 departments are above 80% occupancy (but lower than 90%) and 18 COVID-19 departments are under 50% occupancy. The consensus is that the 2020 winter is one of the least busy ones experienced by the health system in recent years…”[23](#_ENREF_23)  Dr. Yoav Yehezkelli of the Model Common Sense and of PECC: “… lately we have been “informed” by an investigator from the field of computer sciences that this year there is excess mortality because of the overload – this is what people who don’t know what the departments and clinics look like every winter write… the old lady in the hallway, who suffered every winter from flu complications, who lucky for us disappeared this year, only to be replaced by an old lady sick with COVID-19 in an isolated room, surrounded by an exhausted and tired staff wearing space suits.”[24](#_ENREF_24) |
| Intimidation | Using scare tactics  Netanyahu: “These are high numbers, very high. And in our country, we may, God forbid, reach very high numbers. And therefore, we are taking a stand to do everything we can so it won’t happen. The last pandemic we can point to that was similar in its characteristics to what is happening now is the Spanish Flu that raged around the world in 1918…”[25](#_ENREF_25)  The Ministry of Health’s campaign: “There’s a chance we won’t get out of this! Don’t wait for the vaccines to run out – go out and get vaccinated.”[26](#_ENREF_26) | No to intimidation  Prof. Hagai Levine, who represents the voices of opposition within the coalition of Magen Israel’s Professional Coronavirus Cabinet:  “… intimidation is not the optimal tool for motivating the public to act and it is better to provide the public with information, good examples and practical recommendations on how to protect its health and the health of its loved ones…”[27](#_ENREF_27),[28](#_ENREF_28)  PECC: “Paid advertising by the Ministry of Health – “There’s a chance we won’t get out of this”!  Think about it for a moment: The War of Independence. The Yom Kippur War. Suicide attacks.  Never was there a government body that expressed such defeatism and intimidation as the Ministry of Health is doing! Is the message to the public that the Zionist enterprise is under existential threat because of COVID-19? Especially now that those who are at risk are vaccinated? We will win. Of course, we will win. Coronavirus may vanish for good and we might learn to live with it like we live with other winter diseases, but we will get out of this!”[29](#_ENREF_29)  Dr. Yoav Yehezkelli of the Model Common Sense and of PECC: “In the history of epidemics there comes a time that demons come out of hibernation amongst humans and hit human society.  That’s it, they are here big time: The demons of fear, denial, racism, discrimination, hatred of the other, loss of compassion, dismantling of basic values. Why?  The human response to an epidemic navigates the space between fear and denial…”[30](#_ENREF_30) |
| Transparency | The protocols documenting the decision-making process are sealed for 30 years.  “The deliberations of government meetings are classified as confidential material for 30 years.”[31](#_ENREF_31) | No transparency  Prof. Hagai Levine representing the opposition voices within the coalition in Magen Israel’s Professional Coronavirus Cabinet:  “The lack of transparency is unacceptable. There is an information center that is not transparent, and allegedly according to its own declaration it does not have any epidemiology or public health experts. The analysis itself is at times unprofessional, and sometimes incorrect.  For example, in the last report there is no differential approach to the distribution of the disease in Israel, and there is no actual connection between the findings and the recommendations”.[32](#_ENREF_32)  Prof. Eitan Friedman from PECC:  “Evidence of the attempt to prevent a public debate on the decision-making process is the astonishing fact, in my opinion, that the Coronavirus Cabinet’s protocols are sealed for 30 years. What is in there that endangers our security? Why is there a lack of transparency in the decision making process? …”[33](#_ENREF_33) |

**References**

1. Ashkenazi S. What sets Israel apart from Italy and what do the numbers of the race for flattening the curve look like. *Globes.*2020 March 26.

2. Ravid B. Third time: Corona Cabinet convenes - but does not vote for Gamzu's traffic light plan. *Walla.*2020 August 20.

3. Filut A. The closure is behind us, and the government still does not have an orderly plan. *Calcalist.*2021 February 7.

4. Mako morning news. Prof. Yoram Lass: "More people will die from unemployment than from the corona". <https://www.mako.co.il/tv-morning-news/articles/Article-c12a4b984119171027.htm?partner=tagit>. Published 2020 April 19. Accessed 2021 March 13.

5. Qimron U, Gavish U. Maybe the vaccine is already with us? *YNET.*2020 April 13.

6. Ashkenazi S. "Will only cause damage": Prof. Idit Matot opposes the decision on a full closure. And she's not the only one. *Globes.*2020 September 12.

7. Aybee Binyamin interviews Dr. Amir Shachar on the radio. <https://www.youtube.com/watch?app=desktop&v=jb3NqrX96g4>. Published 2020 September 11. Accessed 2021 March 13.

8. The Coronavirus Public Emergency Council. Re: Urgent call for closure prevention. <https://pecc.org.il/docs/mps.pdf>. Published 2020 December 24. Accessed 2021 March 13.

9. IsraeliPM. Prime Minister Netanyahu in statements to the media following a consultation on the Coronavirus. <https://www.youtube.com/watch?app=desktop&v=smJKt2vpJz0>. Published 2020 March 14. Accessed 2021 March 13.

10. Efrati I. Factors involved in managing the corona crisis: Sadetsky torpedoed critical initiatives and hid information. *Haaretz.*2020 June 21.

11. Tvizer I. The closure is a mistake, and this is not how tests are collected either: Dr. Avi Mizrachi is no longer an opposition to decision-making in the government. *N12.*2020 October 25.

12. Ashkenazi S, Weissberg H. Moshe Bar Siman Tov: "Yoram Lass is a cartoon, admiration for him is a very bad thing". *Globes.*2020 June 11.

13. Golan A. Experts claim: there should be a two-week wait between the opening of the education system and the opening of trade. *Israel Hayom.*2020 November 5.

14. The Coronavirus Public Emergency Council. Subject: Continuation of the education system during the Corona crisis. <https://pecc.org.il/docs/edu.pdf>. Published 2020 December 27. Accessed 2021 March 13.

15. The Coronavirus Public Emergency Council. Relax. recover. change! <https://pecc.org.il/docs/titashtu.pdf>. Published 2021 February 9. Accessed 2021 March 13.

16. Qimron U, Shachar A, Levitt M, Gavish U. Israel's opportunity to emerge from the crisis. *Haaretz.*2020 July 20.

17. Glazer H. Collapse? Do we need a closure? senior doctors in the field think the country has lost direction. *Haaretz.*2020 October 5.

18. Gavish U. Why the coefficient of infection R is insignificant, what is immune depth and why the method of closure is ineffective - watch a lecture by Dr. Gavish who explains this in a very simple way. <https://www.facebook.com/watch/?v=423143632087267>. Published 2021 February 10. Accessed 2021 March 13.

19. Bason E. The Ministry of Health announces: It is forbidden to go to parks, it is forbidden to go to malls, it is forbidden to go to the sea. Israel Ministry of Health. <https://www.gov.il/BlobFolder/policy/cor-159050420/he/files_circulars_corona_cor_159050420.pdf>. Published 2020 March 17. Accessed 2021 March 13.

20. Model Common Sense. Masks - our position. <https://www.facebook.com/groups/modelcommonsense/permalink/2504391416520278/>. Published 2020 October 28. Accessed 2021 March 13.

21. Tvizer I. Israeli researchers: hospital congestion may have led to excess mortality. *N12.*2021 January 18.

22. Caspit B, Magal Y. The ministers' dilemma: the accordion method, eradication or relief that can come at a heavy price. *Maariv.*2021 January 31.

23. The Coronavirus Public Emergency Council. Subject: Flawed factual basis presented to government members as part of a phone survey regarding a third lockdown. <https://pecc.org.il/docs/factcheck.pdf>. Published 2020 December 26. Accessed 2021 March 13.

24. Yehezkelli Y. The load in the hospitals does not only depend on numbers, it is also in our hands. Doctors Only. <https://publichealth.doctorsonly.co.il/2021/01/218811/?fbclid=IwAR1wlw5E0O_nlFwPt1OsObkgkCwsNe0HkFOAUxfoM9TA94EGOgmjnolFqX0>. Published 2021 January 21. Accessed 2021 March 13.

25. IsraeliPM. Netanyahu, Health Minister Litzman, Finance Minister Kahlon, and Education Minister Peretz made statements to the media. <https://www.youtube.com/watch?app=desktop&v=qdGqtMobLd8&list=PLt-RWNOCtiva5uyc1AQP5xIeD8jXSYXwM&index=17>. Published 2020 March 12. Accessed 2021 March 13.

26. Israel Ministry of Health. There’s a chance we won’t get out of this! Don’t wait for the vaccines to run out – go out and get vaccinated. <https://www.facebook.com/watch/?v=234778384940428>. Published 2021 February 12. Accessed 2021 March 13.

27. The Hebrew University of Jerusalem. Survey: threats of fines or detention in the Corona crisis did not change the behavior of Israelis. <https://new.huji.ac.il/news/%D7%A1%D7%A7%D7%A8-%D7%94%D7%90%D7%99%D7%95%D7%9E%D7%99%D7%9D-%D7%91%D7%A7%D7%A0%D7%A1%D7%95%D7%AA-%D7%90%D7%95-%D7%91%D7%9E%D7%A2%D7%A6%D7%A8-%D7%91%D7%96%D7%9E%D7%9F-%D7%9E%D7%A9%D7%91%D7%A8-%D7%94%D7%A7%D7%95%D7%A8%D7%95%D7%A0%D7%94-%D7%9C%D7%90-%D7%A9%D7%99%D7%A0%D7%95-%D7%90%D7%AA-%D7%94%D7%AA%D7%A0%D7%94%D7%92%D7%95%D7%AA-%D7%94%D7%99%D7%A9%D7%A8%D7%90%D7%9C%D7%99%D7%9D>. Published 2020. Accessed 2021 March 13.

28. The Corona crisis: the threats of fines and detention have not changed the behavior of Israelis. *Kol Rega.*2020 May 26.

29. Machatzlakorona. <https://www.facebook.com/machatzlakorona/posts/124063049620838>. Published 2021 February 15. Accessed 2021 March 13.

30. Yehezkelli Y. <https://www.facebook.com/100032440341837/posts/418157669275574/>. Published 2021 February 17. Accessed 2021 March 13.

31. Maanit C. Following the "lost" protocols: why does the public not know how the government decided on closure and economic paralysis? *Globes,*2020 June 8.

32. "Unprofessional, not serious": an attack on the report that stated that Israel is entering the second wave of Corona. *The Marker.*2020 June 20.

33. Friedman E. Not everyone was wrong: Israel was dragged after the world's closures - instead of being a role model. *N12.*2021 January 12.

**Supplementary Table S3:** Vaccination Issues

| The Vaccines | The Coalition | The Opposition |
| --- | --- | --- |
| Immunological Depth | Against the Swedish model  Prof. Galia Rahav, Head of the Infectious Disease Unit at Sheba Medical Center and a member of Magen Israel’s Professional Coronavirus Cabinet stressed that the Swedish model is dangerous: “Treatment and assessments about this matter need to be left to public health experts, to epidemiology and infectious diseases experts… in the Swedish model they reached a 6.8% mortality rate versus 0.7% in Israel.”[1](#_ENREF_1) | In favor of the Swedish model  Prof. Udi Qimron, Prof. Eyal Shachar, Prof. Michael Levitt and Dr. Uri Gavish of the Model Common Sense:  “Contrary to popular opinion, it was not the goal of the Swedish policy to get as many people as possible sick with COVID-19. Its goal was and still is to enable normal life, while recommending that vulnerable people take precautions and allowing people who are not at risk to be exposed to the virus and thus develop immunity to it”.[2](#_ENREF_2) |
| At-Risk Groups | Ministry of Health guidelines: encouraging vaccination of the entire population from age 16 up.[3](#_ENREF_3) | Model Common Sense’s position about COVID-19 vaccinations:  At the beginning of the lockdown, we at the Model Common Sense called for protection focused on the population for which COVID-19 poses a high-risk. Due to their high risk, we recommend that this population get vaccinated as soon as possible. Of course, with full consent, without any coercion and inappropriate incentives…”[4](#_ENREF_4) |
| Coerced vaccination and imposing sanctions on those who do not get vaccinated | Promoting a law to impose sanctions on those who do not get vaccinated. The sanctions include prohibitions on sending children to school, going to workplaces, entering shopping malls, restaurants and concerts, air travel [The Sanctions Law]  The Ministry of Justice (2021).[5](#_ENREF_5) | Model Common Sense:  The Model Common Sense supports a letter sent to the Federation of Local Authorities by Adv. Gil Bar-Tal, Chairman of Histadrut HaMaof, in which he wrote: “… notwithstanding the importance of getting a vaccine for COVID-19 – each person and their own reasons whether or not to get vaccinated. The decision to cause harm to wages or scope of position, or any damage, even implicit, is illegal, unconstitutional, unproportional and invalid… hurting employees is prohibited by law”.[6](#_ENREF_6)  PECC: We disagree with the pressure placed on IDF soldiers to get vaccinated. COVID-19 poses a very low risk for soldiers, even lower than the chance of getting wounded in a training accident or a traffic accident on the weekend. And yet, the instruction to encourage vaccination turned into a system of exerting pressures and coercion on the soldiers, in the field units… to get vaccinated.”[7](#_ENREF_7) |
| The Green Passport | Promoting Green Passport guideline granting entrance to public places to those who recovered from COVID-19 or were vaccinated.[8](#_ENREF_8)  The Ministry of Health responded to the initiative of the chairman of the Constitutional Committee: Green Passport for people who are vaccinated, have recovered or were tested, including rapid tests.[9](#_ENREF_9) | Against the Green Passport  Dr. Shelli Segal of the Model Common Sense: “When I first heard about it I became very angry… giving people benefits and punishments depending on whether or not they got vaccinated. First of all it has no medical logic because this vaccine has not been proven to reduce infection and because there is no 100% in anything and whoever is vaccinated may not be 100% protected. That person may even infect others if he is exposed to the virus. I don’t know what to think and how you can discriminate against populations.”[10](#_ENREF_10)  PECC: “…the World Health Organization (WHO) recommended that “immunity certificates” will be used solely for epidemiological purposes, and rejected any other use for those certificates… the Green Passport is an unprecedented measure that is not in line with medical, social and ethical principles, including the individual confidentiality and autonomy, and it prejudices basic rights and is an opening to marking and classifying populations.[11](#_ENREF_11) |
| Requiring teachers to get vaccinated | Cabinet of experts advising Ministry of Health:  “The team of experts, that consists of doctors and healthcare workers, discussed requiring teachers to get vaccinated.”[12](#_ENREF_12) | Model Common Sense: The American CDC declared that schools can be opened safely without vaccinating the teachers, but in Israel several cities decided to impose sanctions on teachers who choose, each for their own reasons, not to get vaccinated”.[13](#_ENREF_13) |

**References**

1. Doctors Only editorial board. The head of the public health services admitted: "there are no clear data on corona victims in the country". *Doctors Only.*2020 September 8.

2. Qimron U, Shachar A, Levitt M, Gavish U. Israel's opportunity to emerge from the crisis. *Haaretz.*2020 July 20.

3. Globes service. The Ministry of Health is expanding "Returning to Life": vaccines for the entire population from the age of 16 starting tomorrow. *Globes.*2021, February 3.

4. Model Common Sense. Position of the 'Model Common Sense' for Corona vaccines. <https://www.facebook.com/groups/modelcommonsense/permalink/2561820680777351>. Published 2021 January 14. Accessed 2021 March 15.

5. Israel Ministry of Health. Law Memorandum for amending the Public Health Ordinance (Amendment No. …) (The New Coronavirus – Providing Information on Vaccinated People (Temporary Order), 5781-2021. <https://www.tazkirim.gov.il/s/law-item/a093Y00001VduXQQAZ/%D7%AA%D7%96%D7%9B%D7%99%D7%A8-%D7%97%D7%95%D7%A7-%D7%9C%D7%AA%D7%99%D7%A7%D7%95%D7%9F-%D7%A4%D7%A7%D7%95%D7%93%D7%AA-%D7%91%D7%A8%D7%99%D7%90%D7%95%D7%AA-%D7%94%D7%A2%D7%9D-%D7%AA%D7%99%D7%A7%D7%95%D7%9F-%D7%9E%D7%A1-%D7%A0%D7%92%D7%99%D7%A3-%D7%94%D7%A7%D7%95%D7%A8%D7%95%D7%A0%D7%94-%D7%94%D7%97%D7%93%D7%A9-%D7%9E%D7%A1%D7%99%D7%A8%D7%AA-%D7%9E%D7%99%D7%93%D7%A2?language=iw&fbclid=IwAR24fZBmGwBmE1OA6K5A6DBeMgOVtrt-ff8fNctYjcBqICulzW1YfJrwUDE>. Published 2021 February 16. Accessed 2021 March 15.

6. Model Common Sense. <https://www.facebook.com/ModelCommonSense/posts/173622774532037>. Published 2020 February 10. Accessed 2021 March 15.

7. The Coronavirus Public Emergency Council. Re: Indirect pressure and coercion of vaccines in the IDF. <https://pecc.org.il/docs/ramatkal.pdf>. Published 2021 January 19. Accessed 2021 March 15.

8. Batson A. Green passport: who is eligible to receive and how is it issued? 2021 March 12.

9. The Knesset. The Ministry of Health responds to the initiative of the Chairman of the Constitution Committee: a green passport for vaccinators, recovering patients and subjects in rapid examinations. <https://m.knesset.gov.il/news/pressreleases/pages/press040121j.aspx>. Published 2021 January 4. Accessed 2021 March 15.

10. Model Common Sense. <https://www.facebook.com/ModelCommonSense/posts/164021385492176>. Published 2021 January 26. Accessed 2021 March 15.

11. The Coronavirus Public Emergency Council. Subject: The green passport - an incorrect use of the immunization certificate. <https://pecc.org.il/docs/greenpass.pdf>. Published 2021 January 17. Accessed 2021 March 15.

12. Cohen M. The experts cabinet recommendation: only teachers who have been vaccinated for Corona will be able to teach frontally. *Walla.*2021 February 3.

13. Model Common Sense. <https://www.facebook.com/ModelCommonSense/posts/171000734794241>. Published 2021 February 6. Accessed 2021 March 15.

**Supplementary 4:** Some of The Personal Attacks by Members of The Coalition on Members of The Opposition Who Criticized Government Policy

| Issue of Conflict | Coalition quotes about the opposition | How the opposition responds to the attack | The unfolding discourse |
| --- | --- | --- | --- |
| An attack by Bar Siman Tov, Director General of the Ministry of Health, against Yoram Lass who was one of the harshest critics of the government’s policy from the outset of the crisis.[1](#_ENREF_1) | Moshe Bar Siman Tov: “Could I have done something to prevent Yoram Lass from saying that COVID-19 is the flu with public relations? In my view, a lot of people were motivated by their need to see their own faces on screen. Some are caricatures, like Yoram Lass.  Some are more serious people who still want to see their own faces on screen”. | Prof. Lass responded: “If we remove hypocricy, and speak the truth, everyone knows that a normative society pays in human life to live a normal life… he and the government are directly responsible for economic, social and mental damage that is unprecedented in the new age. The damage is completely unnecessary.” |  |
| Prof. Grotto was the Ministry of Health's Deputy Director General and attacked Prof. Rotstein, who served as the Director General at Hadassah Hospital because Rotstein criticized the Ministry of Health’s no-testing policy at a Knesset committee.[2-4](#_ENREF_2) | Prof. Itamar Grotto, Ministry of Health's Deputy Director General: “… if Hadassah has the capacity for more tests, then give them to patients according to risk level and not by pocket size… I think this activity amounts to betrayal of the country; I have no other way to describe it… I suggest you decide if you want me or if you want Rotstein even if he has no public health expertise”.[2-4](#_ENREF_2) | “On behalf of Hadassah Hospital: “Prof. Grotto is attacking Hadassah and its Director General due to appropriate and justified decisions they made and as such were trailblazers throughout the war on COVID-19…”[2-4](#_ENREF_2) | Prof. Grotto and Prof. Rotstein join forces and establish a strategic team for fighting COVID-19.[5](#_ENREF_5) |
| Prof. Eitan Friedman served as a member of the Model Common Sense and the PECC. In light of his criticism, his contract as the Director of the Oncogenetics Unit in the Genetics Institute at the Sheba Medical Center was not renewed. This is a department that he founded. |  | Prof. Eitan Friedman:  “… I did not foresee their decision to end the engagement with me. I did not receive the information that would have enabled me to prepare and to ask ‘why’. I don’t know why!! It’s a fact, I won’t be here on 1.3.2021”[6](#_ENREF_6)  “Dr. Sharon Alroy-Preis, for example, called experts, including heads of COVID-19 departments and emergency rooms, as well as myself – ‘COVID-19 deniers’ and ‘anti-vaxxers’. In other words, she chose to use deragotory terms against us, some of which have chilling connotations for the Jewish people, and this to diminish and belittle us instead of confronting our arguments on their merits.[7](#_ENREF_7)  “… the Minister of Health went on the news and bluntly attacked the “professors who don’t have to take responsibility”. | A petition to reinstate following dismissal:From the petition: Prof. Eitan Friedman was fired from Sheba… contrary to all reason, decency and integrity. He was fired just because he did not align with those who dictate policy.[8](#_ENREF_8) |
| Prof. Barbash, former Director General of the Ministry of Health and CEO of Ichilov Medical Center attacks Dr. Amir Shahar and the petition, signed by 120 doctors, that discusses the criticism against the lockdown policy and the adoption of the Swedish model.[9](#_ENREF_9)  An article about the petition:  “A lockdown does not prevent mortality, it causes excess mortality” and called for adopting the Swedish model.[10](#_ENREF_10) | Prof. Barbash: “… full disclosure, I know Amir, we’re even friends. I think those statements are irresponsible…”[9](#_ENREF_9) | Dr. Amir Shahar, director of the Emergency Medicine Department, Laniado Hospital and a member of the Model Common Sense and the PECC:  “We are not buckling under the pressure… we know how to treat the seriously ill. The mortality is not unusual compared to other viral diseases, and the hysteria is totally unwarranted…”[9](#_ENREF_9) |  |
| Dr. Michal Haran, hematology and internal medicine expert, and senior lecturer at the Hebrew University School of Medicine – she wrote a position paper about the reservations and questions that come up in the FDA’s emergency approval process for the Pfizer vaccine. Following her criticism, she got letters from the Ministry of Health’s Investigative Committee on Misleading Advertising. | A letter from the Investigative Committee on Misleading Advertising: “You are hereby requested to refrain from publications that are not based on supported data as acceptable in medicine, and in a manner that may mislead and even endanger the public.”[11](#_ENREF_11)  “… your argument according to which our letter to you amounts to “an attempt to silence and intimidate” is unfounded!“[12](#_ENREF_12) | Dr. Michal Haran’s response to the committee’s letter:  “… 13. The committee’s letter constitutes an attempt to silence a vital professional and public discourse that is related to exercising the basic right to life and health of every man and woman in the country… in all this I am joining many other doctors and scientists worldwide, whose opinion may be in the minority, but their voice is heard, and it is even important that it is heard. Thus, for example, I shall mention Dr. Peter Doshi of the University of Maryland and even the four FDA committee members who voted against emergency approval of the vaccine.[13](#_ENREF_13) | Dr. Rotem Inbar:  “Lately, we are seeing many cases in which doctors or scientists who voice an opinion that opposes the dominant narrative are attacked, vilified, and threatened. Another doctor and senior researcher who is working day in day out to read protocols and studies is not even being given a stage to present her medical arguments to professional forums…”[14](#_ENREF_14) |
| Dr. Alroy-Preis, who served as Head of Public Health in the Health Ministry, attacked Prof. Hagai Levine, who served as the Chairman of the Association of Public Health Doctors and as a member of the Magen Israel professional cabinet after he participated in the movie What if the whole world is wrong? that showcased the voices of experts from the opposition. And Hagai Levine resigned from his role in the Magen Israel professional cabinet and as Chairman of the Association of Public Health Doctors. | Dr. Alroy-Preis about Prof. Hagai Levine in a WhatsApp group: “I suggest the association examine itself… especially you, Hagai, as chairman of the organization…” And when high-ranking people in the Association of Public Health Doctors, in the midst of a pandemic that is threatening all of us, participate in a COVID-19 deniers and anti-vaxxers’ film, the sole purpose of which is to undermine the public trust, what needs to be done is to stop and go do some deep soul searching.”[15](#_ENREF_15) | Prof. Hagai Levine: “One of the most unfortunate things about the COVID-19 crisis is that there are some people who have lost the ability to listen to different opinions…”  “The Association and myself are responsible for the things we say, consistently we are not responsible for what others say, even if it is in the same movie.”[16](#_ENREF_16)  Prof. Hagai Levine announced that he is stepping down as member of the Magen Israel’s national professional cabinet and as Chairman of the Association of Public Health Doctors in Israel. | Four doctors who participated in Orly and Guy’s movie 21.1.2021: And what if the whole world is wrong filed a defamation suit against Dr. Sharon Alroy-Preis.  And they claimed that within a WhatsApp group that has over 250 doctors she, inter alia, called them - even if not by name – COVID-19 deniers and anti-vaxxers.”[17](#_ENREF_17) |

**References**

1. Ashkenazi S, Weissberg H. Moshe Bar Siman Tov: "Yoram Lass is a cartoon, admiration for him is a very bad thing". *Globes.*2020 June 11.

2. Yasur-Beit Or M, Diaz S. "Stop confusing the mind": a confrontation in the Corona committee between Prof. Grotto and the CEO of Hadassah. *Israel Hayom.*2020 April 5.

3. Even Y. Prof. Grotto v. Hadassah CEO: "activities bordering on betrayal of the homeland". *N12.*2020 April 9.

4. Yanko A, Hilaie S. Hadassah Director General: "test data inaccurate"; Deputy Director General of the Ministry of Health: "do not confuse the mind". *Calcalist.*2020 April 5.

5. Efrat B. Uniting forces: Grotto and Rothstein form a strategic team to fight the Corona. *Walla.*2020 July 16.

6. Ulpan Shishi. Why was Professor Eitan Friedman fired? <https://www.facebook.com/watch/?v=232501208362156>. Published 2021 January 14. Accessed 2021 March 14.

7. Friedman E. Not everyone was wrong: Israel was dragged after the world's closures - instead of being a role model. *N12.*2021 January 12.

8. Atzuma. To bring back Prof. Friedman. <https://www.atzuma.co.il/menaker?fbclid=IwAR0-v9M4VSroINsqiJ2K0GePaEj9eL7VF8E8OF_emD1TV-d3WGiAYsyXhuQ>. Published 2020 December 30. Accessed 2021 March 13.

9. Even Y. The director of the emergency room who calls for the adoption of the Swedish method - and Prof. Barbash's sharp answer. *N12.*2020 September, 7.

10. Doctors Only editorial board. Dozens of doctors and experts from the academy petition: "closure does not prevent mortality - it causes excessive mortality". *Doctors Only,*2020 September 6.

11. Leitersdorf I, Hacco E. Dr. Michal Haran - Your publication dated 15.12.20 regarding "position paper" - Corona virus vaccines. <https://www.health.gov.il/Services/Committee/deceive/Documents/2017204.pdf>. Published 2021 January 3. Accessed.

12. Leitersdorf I, Hacco E. Your answer to the Ministry of Health in subject of your publication dated 06.12.20 regarding "position paper" - Corona virus vaccines (Refrence: your answer dated 14.1.21). <https://www.health.gov.il/Services/Committee/deceive/Documents/85188521.pdf>. Published 2021 January 27. Accessed 2021 March 15.

13. Haran M. Dr. Michal Haran's response to the committee's misleading silence letter dated 3.1.21. <https://israeltomorrow.co.il/wp-content/uploads/2021/01/%D7%AA%D7%92%D7%95%D7%91%D7%AA-%D7%93%D7%A8-%D7%94%D7%A8%D7%9F-%D7%9C%D7%9E%D7%9B%D7%AA%D7%91-%D7%A9%D7%9C-%D7%9E%D7%A9%D7%A8%D7%93-%D7%94%D7%91%D7%A8%D7%99%D7%90%D7%95%D7%AA-14.1.21.pdf>. Published 2021 January 14. Accessed 2021 March 15.

14. Inbar R. <https://www.facebook.com/100001479540698/videos/3713742168685065/>. Published 2021 January 1. Accessed 2021 March 15.

15. Yanko A. The confrontation between Dr. Alroy-Preis and the consultant who left for politics: "offends public trust". *YNET*2021 January 10.

16. Levine H. <https://twitter.com/LevineHagai/status/1347873572363120640?s=20>. Published 2021 January 9. Accessed 2021 March 15.

17. Machatzlakorona. Adv. Eyal Rozovsky (20.1.21), publication of defamation and injurious falsehood – demanding an apology and publishing a clarification – letter before action. <https://www.facebook.com/100843218609488/posts/112999864060490/>. Published 2021 January 21. Accessed 2021 March 15.

**Supplementary Table S5:** Mapping topics according to the public’s positions—in support of government policies (coalition), in opposition to them (opposition), and mixed positions

**Coalition**

|  | |  |
| --- | --- | --- |
| Total Sampling |
| **Could herd immunity been achieved naturally without the intervention of the Pfizer vaccine?** | **Could not have been achieved** | 67.6% |
| **Could have been achieved** | 17.0% |
| **I don't know** | 15.4% |
| **Total** | 100.0% |
| 515 |
|  |  |  |
|  | |  |
| Total Sampling |
| **Could herd immunity been achieved naturally without the intervention of the Pfizer and Moderna vaccines?** | **Average** | 1.8 |
|  |  |  |
|  | |  |
| Total Sampling |
| **While a campaign to vaccinate the public is underway and many in the public are getting vaccinated, was it justified or not to impose a third lockdown which was characterized by opening the schools and by less restrictive enforcement?** | **Total justified** | 61.5% |
| **Total unjustified** | 31.6% |
| **I don't know** | 6.9% |
| **Total** | 100.0% |
| 514 |
|  |  |  |
|  | |  |
| Total Sampling |
| **While an operation to vaccinate the public is underway and many in the public are getting vaccinated was it justified or not to impose a third lockdown – the lockdown that was characterized by opening the schools and by less restrictive enforcement?** | **Average** | 2.1 |
|  |  |  |
|  | |  |
| Total Sampling |
| **Was the instruction that no close family member come in contact with elderly people justified or unjustified?** | **Total justified** | 81.7% |
| **Total unjustified** | 15.5% |
| **I don't know** | 2.8% |
| **Total** | 100.0% |
| 515 |
|  |  |  |
|  | |  |
| Total Sampling |
| **Was the instruction that no close family member come in contract with elderly people justified or unjustified?** | **Average** | 1.8 |
|  |  |  |
|  | |  |
| Total Sampling |
| **Which of the following statements is most appropriate?** | **Vaccination should not be required or rewarded** | 20.9% |
| **Vaccination should not be required but those who do get the vaccine should be rewarded** | 38.5% |
| **Citizens must be required to get vaccinated, but not rewarded for it** | 9.5% |
| **Citizens must be required to get vaccinated and rewarded for it** | 26.3% |
| **I don't know** | 4.8% |
| **Total** | 100.0% |
| 515 |
|  |  |  |
|  | |  |
| Total Sampling |
| **I believe the vaccine will protect me from being infected with COVID-19** | **Total true** | 72.1% |
| **Total untrue** | 17.8% |
| **I don't know** | 10.1% |
| **Total** | 100.0% |
| 515 |
|  |  |  |
|  | |  |
| Total Sampling |
| **I believe the vaccine will protect me from being infected with COVID-19** | **Average** | 1.9 |

|  | |  |
| --- | --- | --- |
| Total Sampling |
| **I do not have sufficient information about the COVID-19 vaccine to make an informed decision whether or not to get vaccinated** | **Untrue** | 57.0% |
| **TRUE** | 37.2% |
| **I don't know** | 5.8% |
| **Total** | 100.0% |
| 515 |
|  |  |  |
|  | |  |
| Total Sampling |
| **I do not have sufficient information about the COVID-19 vaccine to make an informed decision whether or not to get vaccinated** | **Average** | 2.2 |
|  |  |  |
|  | |  |
| Total Sampling |
| **It is important that people over 65 and people in at-risk groups get vaccinated.** | **Total true** | 85.2% |
| **Total untrue** | 9.5% |
| **I don't know** | 5.3% |
| **Total** | 100.0% |
| 515 |
|  |  |  |
|  | |  |
| Total Sampling |
| **It is important that people over 65 and people in at-risk groups get vaccinated.** | **Average** | 1.5 |
|  |  |  |
|  | |  |
| Total Sampling |
| **To what extent do you believe that you will be able to return to your normal life routine after getting two doses of the vaccine?** | **Total don't believe** | 24.0% |
| **Total believe** | 64.7% |
| **I don't know** | 11.3% |
| **Total** | 100.0% |
| 515 |
|  |  |  |
|  | |  |
| Total Sampling |
| **To what extent do you believe you will be able to return to your normal life routine after getting the two doses of the vaccine?** | **Average** | 2.1 |

**Opposition**

|  | |  |
| --- | --- | --- |
| The total sampling |
| **Is it your impression that children are suffering or not suffering during the period in which their schools are closed?** | **Total not suffering** | 10.9% |
| **Total suffering** | 86.7% |
| **I don't know** | 2.5% |
| **Total** | 100.0% |
| 515 |
|  |  |  |
|  | |  |
| The total sampling |
| **Children are suffering greatly during the period in which their schools are closed** | **Average** | 3.4 |
|  |  |  |
|  | |  |
| The total sampling |
| **The damage to the economy due to the lockdowns and restrictions harms the country more than the COVID-19 virus would damage it.** | **Total don't agree** | 31.8% |
| **Total agree** | 63.8% |
| **I don't know** | 4.4% |
| **Total** | 100.0% |
| 515 |
|  |  |  |
|  | |  |
| The total sampling |
| **The damage to the economy due to the lockdowns and restrictions harms the country more than the COVID-19 virus would damage it.** | **Average** | 2.9 |
|  |  |  |
|  | |  |
| The total sampling |
| **What is more damaging to the mental health of the country's citizens - the restrictions and lockdowns or the COVID-19 virus had there been no restrictions and lockdowns?** | **COVID-19 virus** | 33.6% |
| **Restrictions and lockdowns** | 63.2% |
| **I don't know** | 3.3% |
| **Total** | 100.0% |
| 515 |
|  |  |  |
|  | |  |
| The total sampling |
| **The restrictions and lockdowns damage the mental health of the country's citizens more than the COVID-19 virus would have hurt them.** | **Average** | 2.8 |
|  |  |  |
|  | |  |
| The total sampling |
| **Is it true or untrue that as long as the COVID-19 Committee's protocols are privileged for 30 years it is difficult for me to trust the government?** | **Total untrue** | 30.9% |
| **Total true** | 59.7% |
| **I don't know** | 9.3% |
| **Total** | 100.0% |
| 515 |
|  |  |  |
|  | |  |
| The total sampling |
| **Is it true or untrue that as long as the COVID-19 Committee's protocols are privileged for 30 years it is difficult for me to trust the government?** | **Average** | 2.8 |
|  |  |  |
|  | |  |
| The total sampling |
| **Is it your impression that the government is presenting to the public or not presenting to the public all the disadvantages of the vaccines?** | **Total presenting disadvantages** | 28.2% |
| **Total not presenting disadvantages** | 60.0% |
| **I don't know** | 11.8% |
| **Total** | 100.0% |
| 515 |
|  |  |  |
|  | |  |
| The total sampling |
| **Is it your impression that the government is presenting the public or not presenting the public all the disadvantages of the vaccines?** | **Average** | 3.0 |
|  |  |  |
|  | |  |
| The total sampling |
| **Are you receiving or not receiving completely transparent information from the Ministry of Health?** | **Total transparent information to a great extent / a very great extent** | 19.4% |
| **Total transparent information to a medium extent / a very low extent** | 14.4% |
| **I don't know** | 9.2% |
| **Total** | 100.0% |
| 515 |

|  | |  |
| --- | --- | --- |
| The total sampling |
| **Are you receiving or not receiving completely transparent information from the Ministry of Health?** | **Average** | 2.9 |
|  |  |
|  |  |
|  |  |
|  |  |

**Mixed positions**

|  | | Total Sampling |
| --- | --- | --- |
| **The damage to the people’s sense of freedom damages Israeli society more than the Coronavirus would have damaged it.** | **Total don't agree** | 44.6% |
| **Total agree** | 50.8% |
| **I don't know** | 4.5% |
| **Total** | 100.0% |
| 515 |
|  |  |  |
|  | |  |
| Total Sampling |
| **The damage to the people’s sense of freedom damages Israeli society more than the Coronavirus would have damaged it.** | **Average** | 2.6 |
|  |  |  |
|  | |  |
| Total Sampling |
| **In the context of COVID-19 information and recommendations – who do you believe more?** | **The doctors who are on the committees advising the Ministry of Health about COVID-19** | 21.8% |
| **The doctors who are not advising the Ministry of Health about COVID-19** | 16.1% |
| **The doctors in both groups to the same extent** | 41.1% |
| **No one** | 10.9% |
| **I don't know** | 10.2% |
| **Total** | 100.0% |
| 515 |
|  |  |  |
|  | |  |
| Total Sampling |
| **In the context of COVID-19 information and recommendations – who do you believe more?** | **Average** | 2.5 |
|  |  |  |
|  | |  |
| Total Sampling |
| **At first it was hard for me to accept the positions of experts who criticized the Ministry of Health’s strict policy and as time goes by, I am accepting their positions** | **Total untrue** | 47.3% |
| **Total true** | 43.8% |
| **I don't know** | 8.9% |
| **Total** | 100.0% |
| 515 |
|  |  |  |
|  | |  |
| Total Sampling |
| **At first it was hard for me to accept the positions of experts who criticized the Ministry of Health’s strict policy and as time goes by, I am accepting their positions** | **Average** | 2.4 |
|  |  |  |
|  | |  |
| Total Sampling |
| **People in the health system who criticize the system or express disagreement with the system are jeopardizing their career** | **Total untrue** | 37.8% |
| **Total true** | 47.4% |
| **I don't know** | 14.8% |
| **Total** | 100.0% |
| 515 |
|  |  |  |
|  | |  |
| Total Sampling |
| **People in the health system who criticize the system or express disagreement with the system are jeopardizing their career** | **Average** | 2.6 |
|  |  |  |
|  | |  |
| Total Sampling |
| **The effects of the vaccine have not been tested over a long period of time and therefore the vaccination operation in Israel is an experiment in humans.** | **Total untrue** | 43.5% |
| **Total true** | 50.4% |
| **I don't know** | 6.1% |
| **Total** | 100.0% |
| 515 |
|  |  |  |
|  | |  |
| Total Sampling |
| **The effects of the vaccine have not been tested over a long period of time and therefore the vaccination operation in Israel is an experiment in humans.** | **Average** | 2.6 |
|  |  |  |
|  | |  |
| Total Sampling |
| **Young people should put off getting the vaccine until they see how it effects people worldwide.** | **Total untrue** | 54.3% |
| **Total true** | 39.2% |
| **I don't know** | 6.5% |
| **Total** | 100.0% |
| 515 |
|  |  |  |
|  | |  |
| Total Sampling |
| **Young people should put off getting the vaccine until they see how it effects people worldwide.** | **Average** | 2.3 |

|  | |  |
| --- | --- | --- |
| Total Sampling |
| **In your opinion what are the methods through which the Prime Minister’s Office and the Ministry of Health are communicating the COVID-19 crisis to the public (you may choose more than one answer)?** | **Intimidation methods** | 53.2% |
| **Methods of encouraging social solidarity** | 33.3% |
| **Methods of providing complete transparency of the information about the COVID-19 crisis** | 24.2% |
| **Methods that originate from understanding the public sentiment (empathy)** | 19.4% |
| **I don't know** | 11.1% |
| **Total** | 141.2% |
| 515 |
|  |  |  |
|  | |  |
| Total Sampling |
| **Should the restrictions on meeting elderly people have been imposed or should each elderly person been allowed to decide for themselves whether or not they want to meet family members?** | **Total should have been prohibited** | 54.3% |
| **Total should have been allowed** | 41.6% |
| **No opinion** | 4.0% |
| **Total** | 100.0% |
| 515 |
|  |  |  |
|  | |  |
| Total Sampling |
| **Should the restrictions on meeting elderly people have been imposed or should each elderly person been allowed to decide for themselves whether or not they want to meet family members?** | **Average** | 2.3 |
